# Supplementary material for: An adaptive quantum mechanics/molecular mechanics method for the infrared spectrum of water: incorporation of the quantum effect between solute and solvent
Source: Royal Society of Chemistry journal article supplement (doi:10.1039/c5cp07136d), 2016-01-01
Supplement: c5cp07136d1.pdf [file c5cp07136d1.pdf]

## *Supplementary Information*

The first application of an adaptive quantum mechanics/molecular mechanics method to the infrared spectrum of water: Incorporation of the quantum effect between solute and solvent

*Hiroshi C. Watanabe,<sup>\*,†</sup> Misa Banno,<sup>§</sup> and Minoru Sakurai<sup>§</sup>*

\*corresponding author, e-mail: watanabe.h.au@m.titech.ac.jp

<sup>†</sup> Research Center for Advanced Science and Technology, The University of Tokyo,

4-6-1 Komaba, Meguro-ku, Tokyo 153-8904 Japan

<sup>§</sup> Center for Biological Resources and Informatics, Tokyo Institute of Technology, B-62

4259 Nagatsuta-cho, Midori-ku, Yokohama 226-8501 Japan

### *QM Water spectrum in vacuo*

In order to evaluate anharmonic effect on infrared spectrum of vapor water by DFTB, we conducted both FTTCF and NMA analyses on an isolated water molecule. Water is well known to have three distinctive band peaks, a symmetric stretch  $\nu_1$ , an angle bending  $\nu_2$ , and an asymmetric stretch  $\nu_3$ . As shown in Figure 1, the two approaches are generally in agreement with respect to position of the three peaks with shift smaller than 1% in agreement with a previous study by Kaminski et al<sup>1</sup>. As shown in Table 1 harmonic approximation causes 10 ~ 20  $\text{cm}^{-1}$  lower-frequency shift on  $\nu_1$  and  $\nu_3$  both in DFTB2 and 3, while the effect on  $\nu_2$  is smaller and no consensus in the shift direction between DFTB2 & 3. It is contrast to MM water models that show systematic higher-frequency shift with regard to  $\nu_2$ .

When compared to the experiment<sup>2</sup>, DFTB2 reproduces  $\nu_2$  shifted to lower-frequency side by 70  $\text{cm}^{-1}$ , whereas it shows considerably higher-frequency shifted  $\nu_1$  and  $\nu_3$ . On the other hand, DFTB3 improves these two stretching modes, in particular  $\nu_1$  in good agreement with the experiment, whereas it gives rise to further deviation of  $\nu_2$ . These errors presumably arise from the different equilibrated structures. DFTB3 improves the OH bond length as shown in Table 3, although it yields larger deviation about the bending angle than DFTB2 instead. We found the angle is fairly subject to a damping parameter  $\zeta$  newly introduced in DFTB3<sup>3</sup> to account peculiarity of hydrogen (data is not shown). Note that DFTB parameter sets have been determined to reproduce several physicochemical properties of diverse molecule set with minimal errors. In general, DFTB3 with 3ob parameter gives better results than DFTB2 with mio parameter for diverse molecules<sup>4</sup>, although it can trade off improvement of specific molecular properties, as is now the case for the bending angle of the water. However, the fact that DFTB2 leads to better reproduction of the angle implies room for further improvement of parameterization in DFTB3, because of the common theoretical framework

**Supplementary Table 1.** Peak positions ( $\text{cm}^{-1}$ ) of the infrared spectra of water in the gas phase. In FTTCF analyses, the peak positions were estimated with Lorentzian fitting.

| Method     |       | $\nu_1$           | $\nu_2$           | $\nu_3$             |
|------------|-------|-------------------|-------------------|---------------------|
| TIP3P-Fs   | NMA   | 3603              | 1362              | 3656                |
|            | FTTCF | 3621              | 1386              | 3675                |
| SPC-Fw     | NMA   | 3587              | 1371              | 3671                |
|            | FTTCF | 3606              | 1378              | 3691                |
| DFTB2      | NMA   | 3720              | 1523              | 3983                |
|            | FTTCF | 3729              | 1524              | 4005                |
| DFTB3      | NMA   | 3651              | 1379              | 3919                |
|            | FTTCF | 3668              | 1373              | 3940                |
| Experiment |       | 3657 <sup>a</sup> | 1595 <sup>a</sup> | 3756 <sup>a,b</sup> |

<sup>a</sup> Shimanouchi et al., 1972<sup>5</sup>,

<sup>b</sup> Huber et al., 1979<sup>6</sup>

## Figures

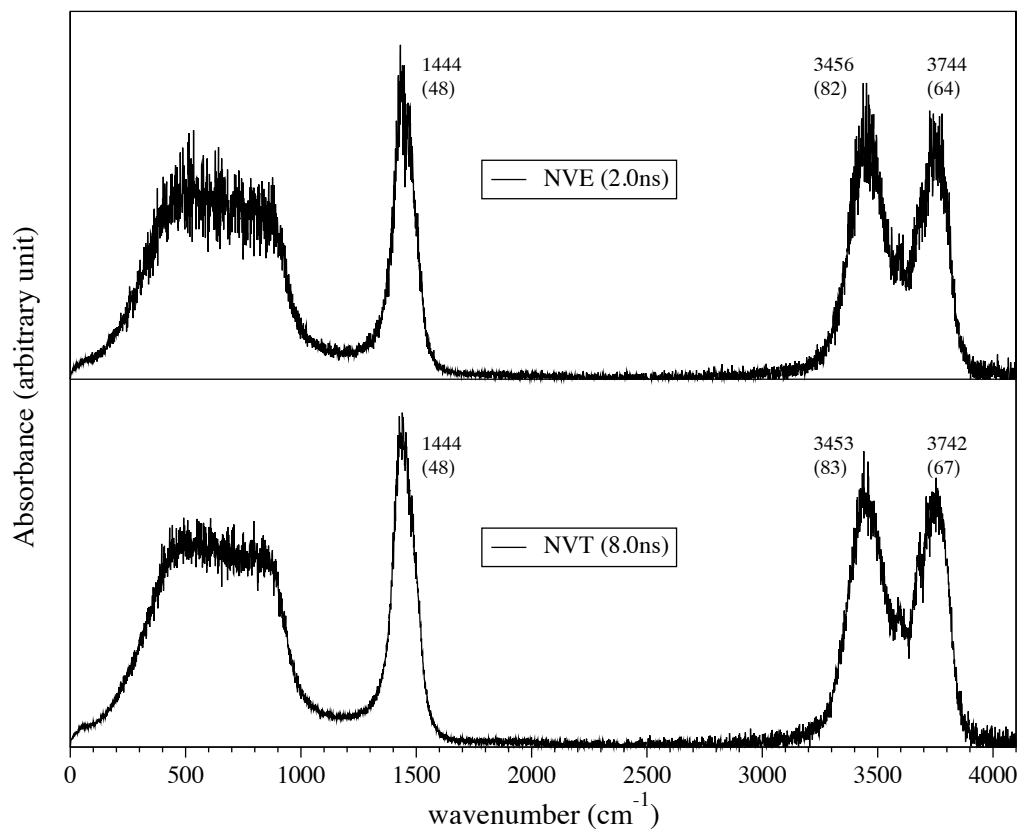

**Supplementary Figure 1.** Comparison of liquid water spectra of c:DFTB3/SPC-Fw system between NVE (top) and NVT simulations (bottom). The average temperature of the NVE simulation was found to be 302.5 K. For the NVT simulation at 300K, the Nosé-Hoover thermostat was adopted at time constant of 500 fs.

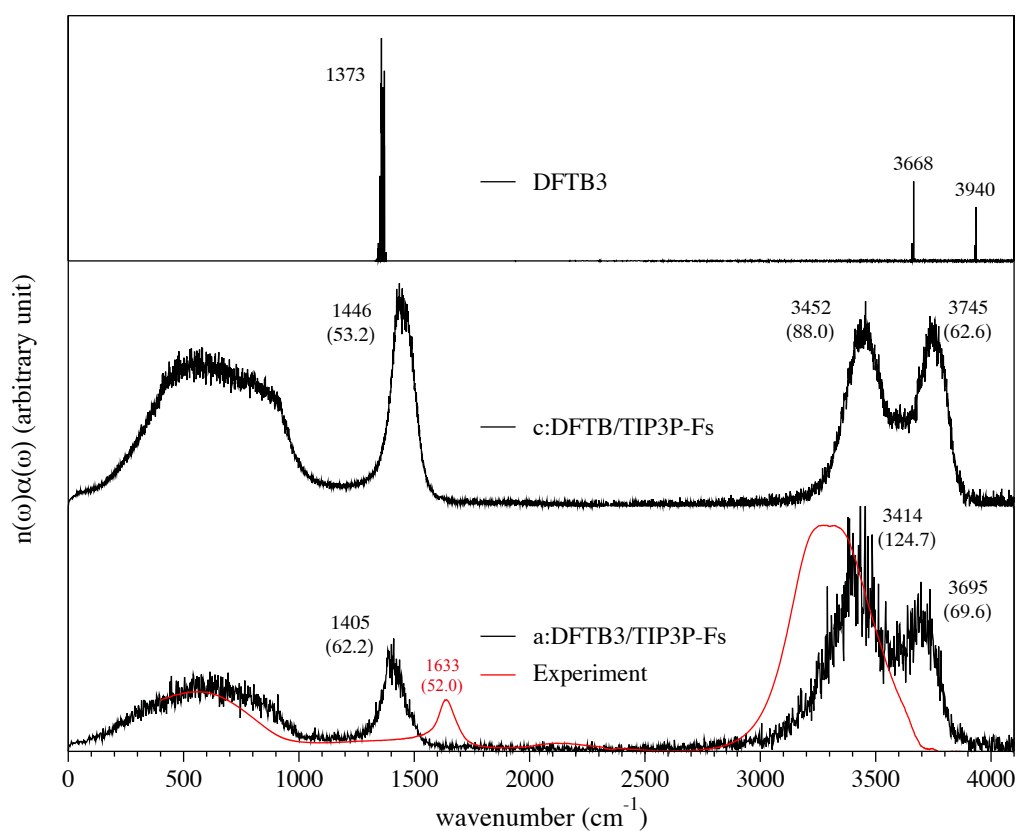

**Supplementary Figure 2.** Comparison between (top) gaseous water spectrum with DFTB3, and liquid water spectra of c:DFTB3/TIP3P-Fs (middle), and a:DFTB3/TIP3P-Fs system (bottom). Experimental spectrum of liquid water is represented by red line as a reference. The band peak positions are presented in the figures accompanied by the HWFM values in parentheses. The spectra are represented with resolution of 2 cm<sup>-1</sup>.

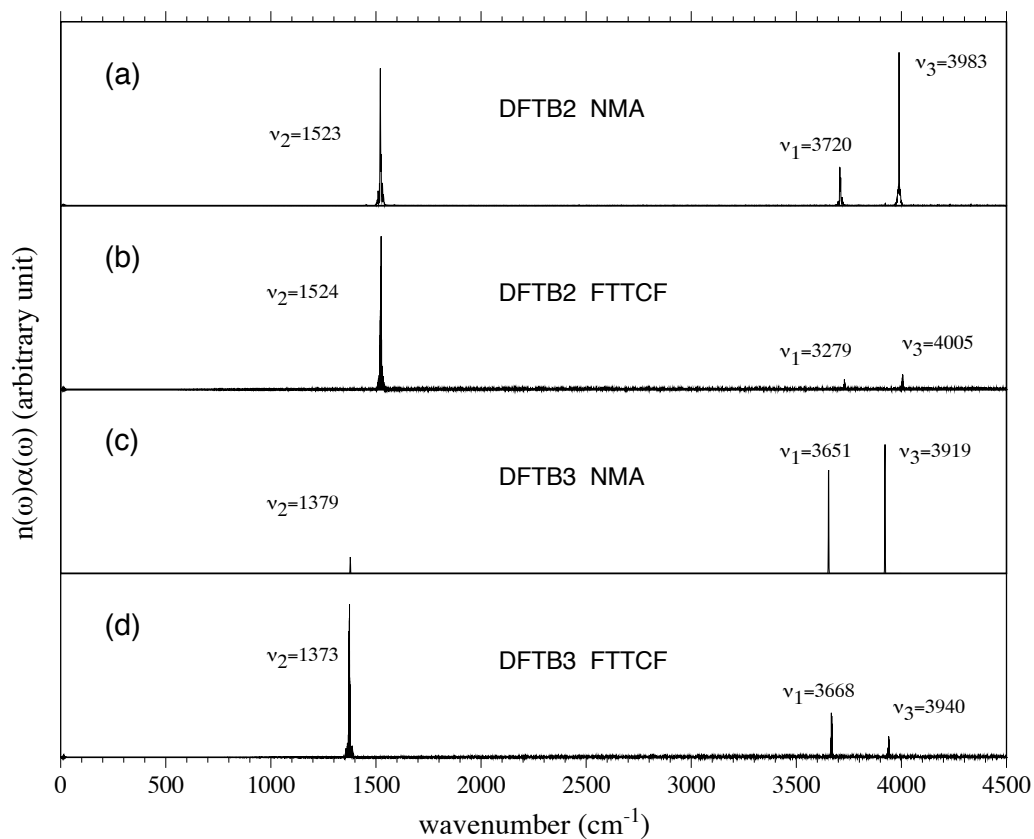

**Supplementary Figure 3.** Comparison of gaseous water spectra between NMA and FTTCF approaches. DFTB2 water spectra with (a) NMA and FTTCF approaches, (c) DFTB3 water spectra with (a) NMA and FTTCF approaches. The band peak positions are presented in the figures accompanied by HWFM values in parentheses.

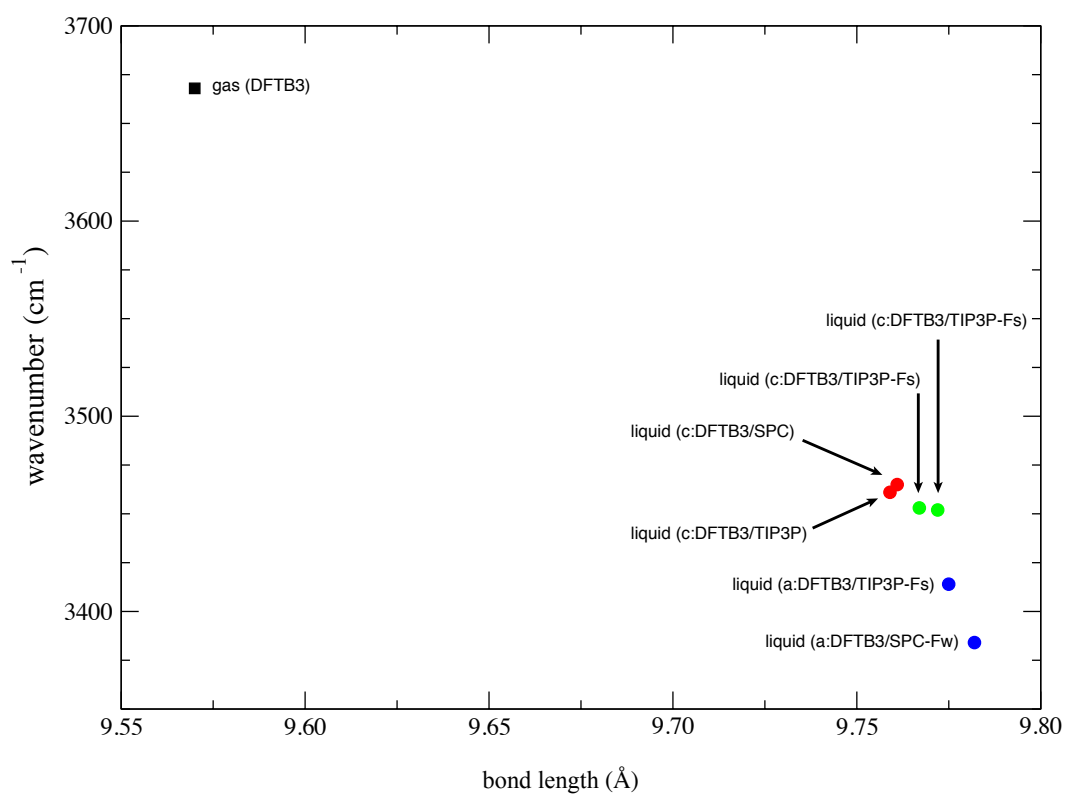

**Supplementary Figure 4.** Relation between OH bond length and the  $\nu_1$  and  $\nu_3$  positions.

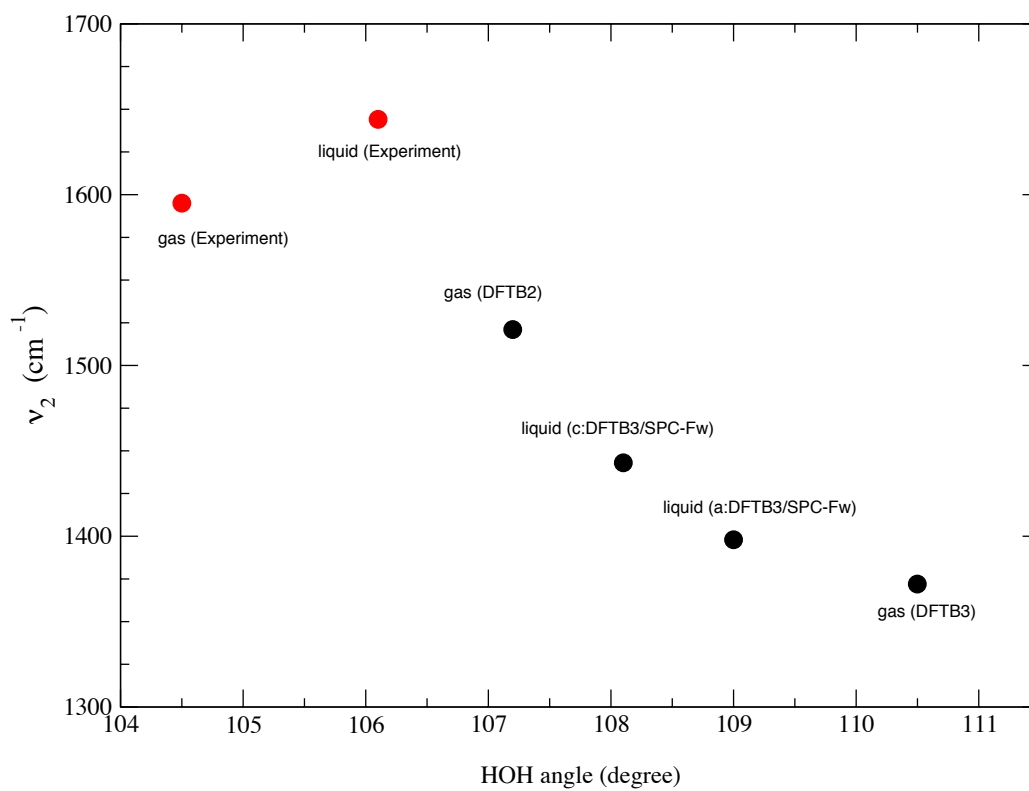

**Supplementary Figure 5.** Relation between HOH bending angles and  $\nu_2$ . Black and red circles stand for simulation and experimental values, respectively.



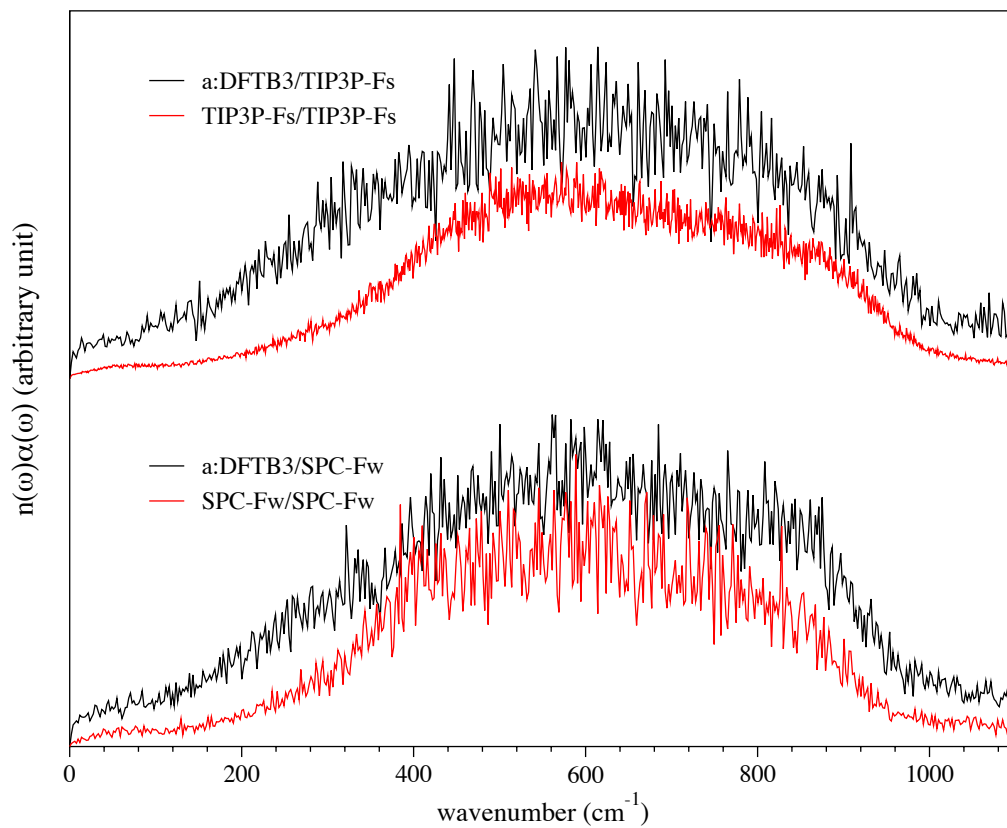

**Supplementary Figure 6.** Comparison of the far infrared spectra of liquid water spectra. (a) The a:DFTB3/TIP3P-Fs (black) and TIP3P-Fs/TIP3P-Fs (red) spectra. (b) The a:DFTB3/SPC-Fw (black) and SPC-Fw/SPC-Fw (red) spectra.

## References

1. Kaminski, S.; Gaus, M.; Elstner, M. *J Phys Chem A* 2012, 116(48), 11927-11937.
2. Barker, E. F.; Sleator, W. W. *J Chem Phys* 1935, 3(11), 660-663.
3. Gaus, M.; Cui, Q. A.; Elstner, M. *J Chem Theory Comput* 2011, 7(4), 931-948.
4. Gaus, M.; Goetz, A.; Elstner, M. *J Chem Theory Comput* 2013, 9(1), 338-354.
5. Shimanouchi, T.; DTIC Document, 1972.
6. Huber, K. P.; Herzberg, G. *Molecular Spectra and Molecular Structure. IV. Constants Of Diatomic Molecules*; Van Nostrand Reinhold Inc., 1979.
